PEARLS

# Adenosine to inosine mRNA editing in fungi and how it may relate to fungal pathogenesis

Ines Teichert \*

Lehrstuhl für Allgemeine und Molekulare Botanik, Ruhr-Universität Bochum, Germany

\* [ines.teichert@rub.de](mailto:ines.teichert@rub.de)

One central hypothesis of molecular biology is that a protein sequence can be deduced from the DNA sequence. However, diverse processes at the DNA, mRNA, and even protein level can lead to protein sequences that differ from the deduced sequence. One such process is co- or post-transcriptional RNA editing. RNA editing is found in all domains of life and in diverse RNA species from bacteria and archaea as well as plastids, mitochondria, and nuclei of eukaryotes [1,2,3,4]. This review will give an overview of different types of mRNA editing and then focus on fungal mRNA editing, which was described only recently.

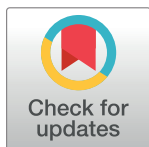

## Q1: What is mRNA editing?

mRNA editing is the occurrence of base substitutions and short insertions or deletions (indels) in an mRNA that could alternatively be directly encoded by the genomic DNA [2]. Typical mRNA editing events are uridine (U) indels as well as cytosine (C)-to-U deamination, reverse U-to-C editing, and adenosine (A) to inosine (I) deamination (Fig 1). Effectively, A-to-I editing generates A-to-guanosine (G) substitutions in coding RNA, because the ribosome interprets I as G during translation.

Many land plant lineages show extensive C-to-U editing and sometimes U-to-C editing in mitochondrial and plastid mRNA, a process that seems to be independent of transcription [5,6,7]. Similar editing events as well as mechanistically distinct U indels and C insertions occur in mitochondria of some metazoan species, trypanosomes, and myxomycetes, among others [2,8]. A-to-I editing of nuclear protein-coding transcripts has been described for some metazoa and filamentous fungi [2,9]. Editing of organellar and nuclear mRNA have opposing effects on proteins. In general, editing of organellar transcripts is restorative, whereas editing of nuclear transcripts leads to proteome diversification [8,10; Fig 1]. The following sections will focus on A-to-I editing of nuclear mRNA.

## Q2: Is mRNA editing common in fungi?

The occurrence of mRNA editing in fungi was revealed only recently for the basidiomycetes *Ganoderma lucidum* and *Pleurotus ostreatus* as well as for the filamentous ascomycetes *F. graminearum*, *F. verticillioides*, *Neurospora crassa*, *N. tetrasperma*, *Pyronema confluens*, and *Sordaria macrospora* [11,12,13,14,15]. In the basidiomycete *G. lucidum*, editing shows neither a base change nor a tissue preference [14]. However, editing in ascomycetes shows a preference for A-to-I RNA editing specifically during fruiting body formation [11,12,13]. In *F. graminearum* and *N. crassa*, editing was detected only in datasets from sexually developing samples, not from asexual spores or vegetative mycelia [11,13]. Interestingly, the ascomycetous yeast *Schizosaccharomyces pombe* does not show evidence of mRNA editing during meiosis [12].

### OPEN ACCESS

**Citation:** Teichert I (2018) Adenosine to inosine mRNA editing in fungi and how it may relate to fungal pathogenesis. PLoS Pathog 14(9): e1007231. <https://doi.org/10.1371/journal.ppat.1007231>

**Editor:** Laurie Read, University at Buffalo School of Medicine and Biomedical Sciences, Buffalo, UNITED STATES

**Published:** September 27, 2018

**Copyright:** © 2018 Ines Teichert. This is an open access article distributed under the terms of the [Creative Commons Attribution License](https://creativecommons.org/licenses/by/4.0/), which permits unrestricted use, distribution, and reproduction in any medium, provided the original author and source are credited.

**Funding:** This work was funded by DFG grant KU517/16-1. The funders had no role in study design, data collection and analysis, decision to publish, or preparation of the manuscript.

**Competing interests:** The authors have declared that no competing interests exist.

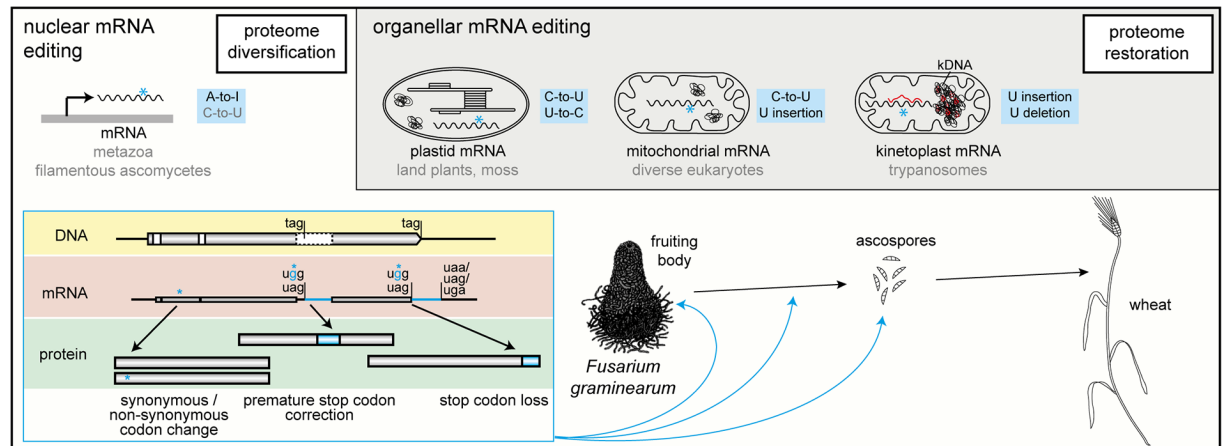

**Fig 1. Types of mRNA editing and possible relation to fungal pathogenesis.** Editing of nuclear mRNA leads to diversification of the proteome, whereas editing of plastid, mitochondrial, and kinetoplast mRNA is mostly restorative. Distinct editing events (marked by blue asterisks) occur in organellar as well as nuclear transcripts. Undulated lines indicate transcripts. In the human parasite *Trypanosoma brucei*, transcripts derived from maxicircle DNA (black in kDNA) are edited using guide RNA (red) derived from minicircle DNA (red in kDNA). The plant pathogenic fungus *Fusarium graminearum* shows A-to-I editing of nuclear transcripts during the late sexual phase. Editing leads to diverse changes at the protein level as shown in the blue-outlined box. Editing of distinct transcripts may affect the maturation of fruiting bodies and the formation and discharge of ascospores (blue arrows), which are the primary inoculum of this fungus. A, adenosine; I, inosine, kDNA, kinetoplastid DNA.

<https://doi.org/10.1371/journal.ppat.1007231.g001>

Thus, RNA editing seems to be restricted to multicellular fungi—specifically A-to-I RNA editing to filamentous ascomycetes that generate fruiting bodies.

### Q3: How is RNA editing catalyzed?

Metazoan A-to-I RNA editing of nuclear transcripts is catalyzed by adenosine deaminases acting on RNA (ADARs) [16]. These enzymes deaminate the adenine base to hypoxanthine, resulting in an I instead of an A nucleotide. ADARs contain a deaminase domain and dsRNA-binding domains that bind to double-stranded RNA regions in which the editing sites are located [17]. Besides RNA secondary structure, the base opposite to the target A (preferentially a C) and the flanking nucleotides affect editing efficiency. The human genome encodes five ADARs, two of which show editing activity.

Fungi, like plants, do not encode ADAR homologs, and it remains unknown how fungi catalyze A-to-I RNA editing [9,17]. Fungal editing, in contrast to metazoan editing, preferentially targets As in hairpin loops, and loop stability affects editing efficiency [11]. Furthermore, the sequence context of the editing site differs from that described for human ADARs. Liu and colleagues [11] suggested that adenosine deaminases acting on tRNA (ADATs) may mediate mRNA editing in fungi, possibly together with specific cofactors. Indeed, ADATs were recently shown to catalyze the deamination of adenosines in both tRNA and mRNA in bacteria [18]. However, deletion of the *F. graminearum* ADAT-encoding gene *FgTAD1* had no effect on editing, and deletion of *FgTAD2* and *FgTAD3* may be lethal [11]. Thus, the enzymatic activity determining fungal A-to-I RNA editing remains obscure.

### Q4: What are the consequences of RNA editing?

As mentioned above, A-to-I editing of nuclear transcripts leads to proteome diversification. A-to-I editing in humans occurs in a tissue-specific fashion and targets mostly noncoding regions. The few targeted protein-coding transcripts are related to neurological functions [19].

A-to-I editing in filamentous ascomycetes is similarly restricted to a specific stage in the fungal life cycle (see Q2). However, in contrast to metazoan editing sites, most fungal A-to-I editing sites are located in coding regions [11,12,13]. Editing thus can result in synonymous and nonsynonymous codon changes, stop codon loss, and premature stop codon correction in pseudogenes [11,12,13; Fig 1]. In the latter case, editing affects stop codons in in silico wrongly annotated introns that were automatically annotated to avoid the stop codon(s) and keep conserved downstream sequences in the gene model. Thus, editing leads to synthesis of a full-length protein, as described for the *F. graminearum* PUK1 kinase [11].

The question whether editing is adaptive or nonadaptive is still under debate. RNA editing allows the generation of diverse proteins from one gene, and it has thus been hypothesized that it may facilitate adaptive evolution [20]. In cephalopods, behavioral complexity has been correlated with extensive editing of neuronal transcripts, which is under positive selection [21]. Editing sites introducing nonsynonymous codon changes were found to be highly adaptive and under positive selection in *N. crassa* [13]. However, in humans, only a few codon-changing editing events have been associated with altered protein functions, and it has been proposed that most recoding editing events occur as a result of promiscuous editing by ADARs [22]. A neutral evolution model as proposed by, e.g., Gray [23], might also explain the little conservation of individual editing sites, whereas over 20,000 editing sites were found in each *F. graminearum*, *N. crassa*, and *N. tetrasperma*—only 454 are conserved between all three species [13].

### Q5: How does RNA editing relate to fungal pathogenesis?

A correlation of RNA editing and pathogenesis has long been known from trypanosomes, e.g., vertebrate parasites like *T. brucei* and *T. cruzi*, causing sleeping sickness and Chagas disease in humans, respectively [24]. The first editing event was detected because the trypanosomal mitochondrial *coxII* gene does contain frame-shifts, implying a faulty gene sequence that needs to be corrected for proper biological function of the encoded protein [25]. The single mitochondrion of *T. brucei* displays an adaptation to the parasite lifestyle; the procyclic form in the tsetse fly has a standard mitochondrion, whereas the slender bloodstream form (BF) has a tubular mitochondrion with a nonfunctional respiratory chain [26]. Editing activity per se is essential for both the procyclic and the BF type of *T. brucei* [27]. However, editing of distinct transcripts may be essential just in the BF form [26,28,29].

Recently, mRNA editing by ADAT activity was shown to occur in *Escherichia coli*. There, editing targets evolutionary conserved toxin—antitoxin pairs. Editing of the *hokB* toxin transcript increased toxicity and was conserved in the pathogenic bacteria *Klebsiella pneumoniae* and *Yersinia enterocolitica* [18], revealing another correlation of editing and pathogenicity.

Fungal nuclear genes whose transcripts are affected by editing tend to have a role in late sexual development, i.e., meiotic spore (ascospore) formation and/or ascospore discharge [11,15,30; Fig 1]. This observation is of interest because ascospores are the primary inoculum of several phytopathogenic ascomycetes, including the wheat and barley pathogen *F. graminearum*, *Sclerotinia sclerotiorum*, causing stem rot, or *Blumeria graminis* f. sp. *tritici*, causing wheat powdery mildew [31,32,33; Fig 1]. Whether A-to-I mRNA editing is essential for ascospore generation remains to be determined, like the enzymatic activity underlying fungal editing. Ultimately, however, one may envision a fungal-specific editing factor as a drug target to control those phytopathogenic fungi that use ascospores as primary infecting agents.

### Acknowledgments

I thank Ulrich Kück for constructive comments and his support and Dominik Terfehr for critical reading. I apologize to those researchers whose papers could not be cited due to space limitations.

## References

1. Betat H, Long Y, Jackman JE, Morl M (2014) From end to end: tRNA editing at 5'- and 3'-terminal positions. *Int J Mol Sci* 15: 23975–23998. <https://doi.org/10.3390/ijms151223975> PMID: 25535083
2. Knoop V (2011) When you can't trust the DNA: RNA editing changes transcript sequences. *Cell Mol Life Sci* 68: 567–586. <https://doi.org/10.1007/s00018-010-0538-9> PMID: 20938709
3. Blow MJ, Grocock RJ, van Dongen S, Enright AJ, Dicks E, et al. (2006) RNA editing of human microRNAs. *Genome Biol* 7: R27. <https://doi.org/10.1186/gb-2006-7-4-r27> PMID: 16594986
4. Yang W, Chendrimada TP, Wang Q, Higuchi M, Seeburg PH, et al. (2006) Modulation of microRNA processing and expression through RNA editing by ADAR deaminases. *Nat Struct Mol Biol* 13: 13–21. <https://doi.org/10.1038/nsmb1041> PMID: 16369484
5. Ichinose M, Sugita M (2017) RNA editing and its molecular mechanism in plant organelles. *Genes* 8: 5.
6. Takenaka M, Zehrmann A, Verbitskiy D, Hartel B, Brennicke A (2013) RNA editing in plants and its evolution. *Annu Rev Genet* 47: 335–352. <https://doi.org/10.1146/annurev-genet-111212-133519> PMID: 24274753
7. Hinrichsen I, Bolle N, Paun L, Kempken F (2009) RNA processing in plant mitochondria is independent of transcription. *Plant Mol Biol* 70: 663–668. <https://doi.org/10.1007/s11103-009-9498-6> PMID: 19412686
8. Sloan DB (2017) Nuclear and mitochondrial RNA editing systems have opposite effects on protein diversity. *Biol Lett* 13: 20170314. <https://doi.org/10.1098/rsbl.2017.0314> PMID: 28855414
9. Wang C, Xu JR, Liu H (2016) A-to-I RNA editing independent of ADARs in filamentous fungi. *RNA Biol* 13: 940–945. <https://doi.org/10.1080/15476286.2016.1215796> PMID: 27533598
10. Sun T, Bentolila S, Hanson MR (2016) The unexpected diversity of plant organelle RNA editosomes. *Trends Plant Sci* 21: 962–973. <https://doi.org/10.1016/j.tplants.2016.07.005> PMID: 27491516
11. Liu H, Wang Q, He Y, Chen L, Hao C, et al. (2016) Genome-wide A-to-I RNA editing in fungi independent of ADAR enzymes. *Genome Res* 26: 499–509. <https://doi.org/10.1101/gr.199877.115> PMID: 26934920
12. Teichert I, Dahlmann TA, Kück U, Nowrousian M (2017) RNA editing during sexual development occurs in distantly related filamentous ascomycetes. *Genome Biol Evol* 9: 855–868. <https://doi.org/10.1093/gbe/evx052> PMID: 28338982
13. Liu H, Li Y, Chen D, Qi Z, Wang Q, et al. (2017) A-to-I RNA editing is developmentally regulated and generally adaptive for sexual reproduction in *Neurospora crassa*. *Proc Natl Acad Sci U S A* 114: 7756–7765.
14. Zhu Y, Luo H, Zhang X, Song J, Sun C, et al. (2014) Abundant and selective RNA-editing events in the medicinal mushroom *Ganoderma lucidum*. *Genetics* 196: 1047–1057. <https://doi.org/10.1534/genetics.114.161414> PMID: 24496007
15. Liu T, Li H, Ding Y, Qi Y, Gao Y, et al. (2017) Genome-wide gene expression patterns in dikaryon of the basidiomycete fungus *Pleurotus ostreatus*. *Braz J Microbiol* 48: 380–390. <https://doi.org/10.1016/j.bjm.2016.12.005> PMID: 28089161
16. Bass BL (2002) RNA editing by adenosine deaminases that act on RNA. *Annu Rev Biochem* 71: 817–846. <https://doi.org/10.1146/annurev.biochem.71.110601.135501> PMID: 12045112
17. Wang Y, Zheng Y, Beal PA (2017) Adenosine deaminases that act on RNA (ADARs). *Enzymes* 41: 215–268. <https://doi.org/10.1016/bs.enz.2017.03.006> PMID: 28601223
18. Bar-Yaacov D, Mordret E, Towers R, Biniashvili T, Soyris C, et al. (2017) RNA editing in bacteria recodes multiple proteins and regulates an evolutionarily conserved toxin-antitoxin system. *Genome Res* 27: 1696–1703. <https://doi.org/10.1101/gr.222760.117> PMID: 28864459
19. Zipeto MA, Jiang Q, Melese E, Jamieson CH (2015) RNA rewriting, recoding, and rewiring in human disease. *Trends Mol Med* 21: 549–559. <https://doi.org/10.1016/j.molmed.2015.07.001> PMID: 26259769
20. Gommans WM, Mullen SP, Maas S (2009) RNA editing: a driving force for adaptive evolution? *Bioessays* 31: 1137–1145. <https://doi.org/10.1002/bies.200900045> PMID: 19708020
21. Liscovitch-Brauer N, Alon S, Porath HT, Elstein B, Unger R, et al. (2017) Trade-off between transcriptome plasticity and genome evolution in cephalopods. *Cell* 169: 191–202 e111. <https://doi.org/10.1016/j.cell.2017.03.025> PMID: 28388405
22. Xu G, Zhang J (2014) Human coding RNA editing is generally nonadaptive. *Proc Natl Acad Sci U S A* 111: 3769–3774. <https://doi.org/10.1073/pnas.1321745111> PMID: 24567376
23. Gray MW (2012) Evolutionary origin of RNA editing. *Biochemistry* 51: 5235–5242. <https://doi.org/10.1021/bi300419r> PMID: 22708551

24. Barrett MP, Burchmore RJ, Stich A, Lazzari JO, Frasch AC, et al. (2003) The trypanosomiases. *Lancet* 362: 1469–1480. [https://doi.org/10.1016/S0140-6736\(03\)14694-6](https://doi.org/10.1016/S0140-6736(03)14694-6) PMID: 14602444
25. Benne R, Van den Burg J, Brakenhoff JP, Sloof P, Van Boom JH, et al. (1986) Major transcript of the frameshifted *coxII* gene from trypanosome mitochondria contains four nucleotides that are not encoded in the DNA. *Cell* 46: 819–826. PMID: 3019552
26. Brown SV, Hosking P, Li J, Williams N (2006) ATP synthase is responsible for maintaining mitochondrial membrane potential in bloodstream form *Trypanosoma brucei*. *Eukaryot Cell* 5: 45–53. <https://doi.org/10.1128/EC.5.1.45-53.2006> PMID: 16400167
27. Read LK, Lukes J, Hashimi H (2016) Trypanosome RNA editing: the complexity of getting U in and taking U out. *Wiley Interdiscip Rev RNA* 7: 33–51. <https://doi.org/10.1002/wrna.1313> PMID: 26522170
28. Schnauffer A, Clark-Walker GD, Steinberg AG, Stuart K (2005) The F1-ATP synthase complex in bloodstream stage trypanosomes has an unusual and essential function. *EMBO J* 24: 4029–4040. <https://doi.org/10.1038/sj.emboj.7600862> PMID: 16270030
29. Schnauffer A, Panigrahi AK, Panicucci B, Igo RP Jr, Wirtz E, et al. (2001) An RNA ligase essential for RNA editing and survival of the bloodstream form of *Trypanosoma brucei*. *Science* 291: 2159–2162 PMID: 11251122
30. Cao S, He Y, Hao C, Xu Y, Zhang H, et al. (2017) RNA editing of the *AMD1* gene is important for ascus maturation and ascospore discharge in *Fusarium graminearum*. *Sci Rep* 7: 4617. <https://doi.org/10.1038/s41598-017-04960-7> PMID: 28676631
31. Jankovics T, Komaromi J, Fabian A, Jager K, Vida G, et al. (2015) New insights into the life cycle of the wheat powdery mildew: direct observation of ascospore infection in *Blumeria graminis* f. sp. *tritici*. *Phytopathology* 105: 797–804. <https://doi.org/10.1094/PHYTO-10-14-0268-R> PMID: 25710203
32. Doughan B, Rollins JA (2016) Characterization of *MAT* gene functions in the life cycle of *Sclerotinia sclerotiorum* reveals a lineage-specific *MAT* gene functioning in apothecium morphogenesis. *Fungal Biol* 120: 1105–1117. <https://doi.org/10.1016/j.funbio.2016.06.007> PMID: 27567717
33. Goswami RS, Kistler HC (2004) Heading for disaster: *Fusarium graminearum* on cereal crops. *Mol Plant Pathol* 5: 515–525. <https://doi.org/10.1111/j.1364-3703.2004.00252.x> PMID: 20565626
